# Supplementary material
Source: PubMed Central journal article supplement (PMC9900948)
Supplement: NIHMS1577708-supplement-2.pdf [file NIHMS1577708-supplement-2.pdf]

**Supplemental Table 1. Correlation<sup>a</sup> between scores in the positive and negative valence symptoms subscales and other Items/scores of the Inventory of Depressive Symptomatology - Clinician Version (IDS-C).**

| IDS-C <sub>22</sub> items (IDS-C <sub>30</sub> not including PV or NV items) | Score in the Positive Valence Symptom subscale | Score in the Negative Valence Symptoms subscale |
|------------------------------------------------------------------------------|------------------------------------------------|-------------------------------------------------|
| <i>Individual Items</i>                                                      |                                                |                                                 |
| Falling asleep (initial insomnia)                                            | .102                                           | .152                                            |
| Sleep during the night (middle insomnia)                                     | .155                                           | .052                                            |
| Waking up too early (terminal insomnia)                                      | .167                                           | .114                                            |
| Sleeping too much                                                            | .039                                           | -.051                                           |
| Feeling sad (sad mood)                                                       | .424                                           | .194                                            |
| Feeling irritable                                                            | .164                                           | .286                                            |
| Mood in relation to the time of the day (diurnal mood variation)             | .018                                           | .027                                            |
| Quality of your mood (distinct quality of mood)                              | -.044                                          | -.003                                           |
| Decreased appetite                                                           | .230                                           | .168                                            |
| Increased appetite                                                           | .046                                           | -.038                                           |
| Decreased weight                                                             | .198                                           | .142                                            |
| Increased weight                                                             | .031                                           | -.057                                           |
| Concentration/Decision making                                                | .350                                           | .253                                            |
| View of my self (self-criticism)                                             | .242                                           | .263                                            |
| View of my future (hopelessness)                                             | .390                                           | .197                                            |
| Thoughts of death or suicide                                                 | .279                                           | .179                                            |
| Feeling slowed down (psychomotor retardation)                                | .237                                           | .026                                            |
| Feeling restless (psychomotor agitation)                                     | .010                                           | .139                                            |
| Bodily aches and pains                                                       | .225                                           | .149                                            |
| Other bodily symptoms                                                        | .073                                           | .174                                            |
| Constipation/diarrhea (digestive problems)                                   | .144                                           | .232                                            |
| Leadens paralysis/Physical energy                                            | .267                                           | .049                                            |
| <i>Composite scores</i>                                                      |                                                |                                                 |
| Positive valence symptoms subscale                                           | 1.000                                          | .224                                            |
| Negative valence symptoms subscale                                           | .224                                           | 1.000                                           |
| QIDS-C <sub>14</sub> (QIDS-C <sub>16</sub> , except PVS and NVS items)       | .528                                           | .338                                            |
| IDS-C <sub>22</sub> 22 (IDS-C <sub>30</sub> , except PVS and NVS items)      | .505                                           | .354                                            |

<sup>a</sup> Pearson's correlation coefficients were used.

**Supplemental Table 2. Detection ranges<sup>a</sup> and descriptions of baseline levels of immunomarkers measured in individuals with depressive disorder (N=166).**

| Immunomarkers                              | Detection range |             | Descriptives<br>Median (25% - 75%) |
|--------------------------------------------|-----------------|-------------|------------------------------------|
|                                            | Lower limit     | Upper limit |                                    |
| <i>Primarily pro-inflammatory factors</i>  |                 |             |                                    |
| C-reactive protein (CRP) (mg/L)            | 0.01            | 50          | 2.0 (0.7 – 5.7)                    |
| Interferon-gamma (pg/ml)                   | 92.6            | 52,719      | 255.6 (180.8 – 338.5)              |
| Interleukin 1 beta (pg/ml)                 | 3.2             | 3,261       | 9.8 (8.0 – 11.6)                   |
| Interleukin 2 (pg/ml) [n=94]               | 2.1             | 17,772      | 9.4 (6.7 – 15.1)                   |
| Interleukin 6 (pg/ml) [n=160]              | 2.3             | 18,880      | 15.9 (12.6 – 19.3)                 |
| Interleukin 8 (pg/ml) [n=165]              | 1.9             | 26,403      | 24.0 (19.1 – 41.0)                 |
| TNF-alpha (pg/ml)                          | 5.8             | 95,484      | 106.2 (91.9 – 118.3)               |
| <i>Primarily anti-inflammatory factors</i> |                 |             |                                    |
| Interleukin 4 (pg/ml)                      | 2.2             | 3,467       | 8.9 (7.6 – 10.6)                   |
| Interleukin 10 (pg/ml) [n=127]             | 2.2             | 8,840       | 18.2 (13.7 – 29.4)                 |
